# Supplementary material for: Epigenomic Reprogramming toward Mesenchymal-Epithelial Transition in Ovarian-Cancer-Associated Mesenchymal Stem Cells Drives Metastasis
Source: PubMed Central journal article supplement — Cell Rep. Author manuscript; Available in PMC 2020 Dec 18. (PMC7747301; doi:10.1016/j.celrep.2020.108473), 2020-12-08
Supplement: NIHMS1653542-supplement-1.pdf [file NIHMS1653542-supplement-1.pdf]

Cell Reports, Volume 33

## Supplemental Information

### **Epigenomic Reprogramming toward Mesenchymal- Epithelial Transition in Ovarian-Cancer-Associated Mesenchymal Stem Cells Drives Metastasis**

**Huihui Fan, Huda I. Atiya, Yeh Wang, Thomas R. Pisanic, Tza-Huei Wang, Ie-Ming Shih, Kelly K. Foy, Leonard Frisbie, Ronald J. Buckanovich, Alison A. Chomiak, Rochelle L. Tiedemann, Scott B. Rothbart, Chelsea Chandler, Hui Shen, and Lan G. Coffman**

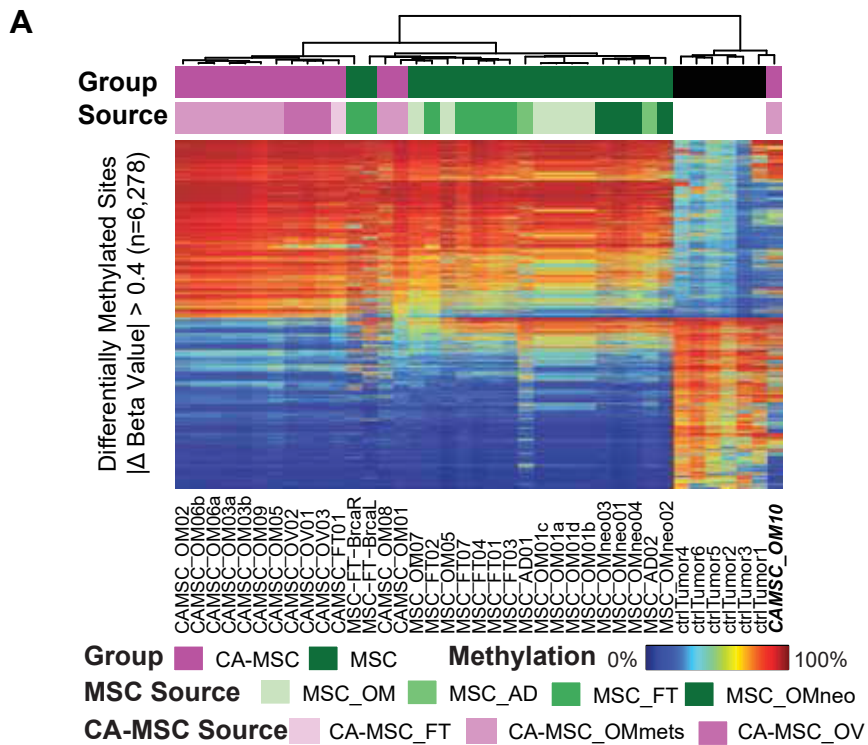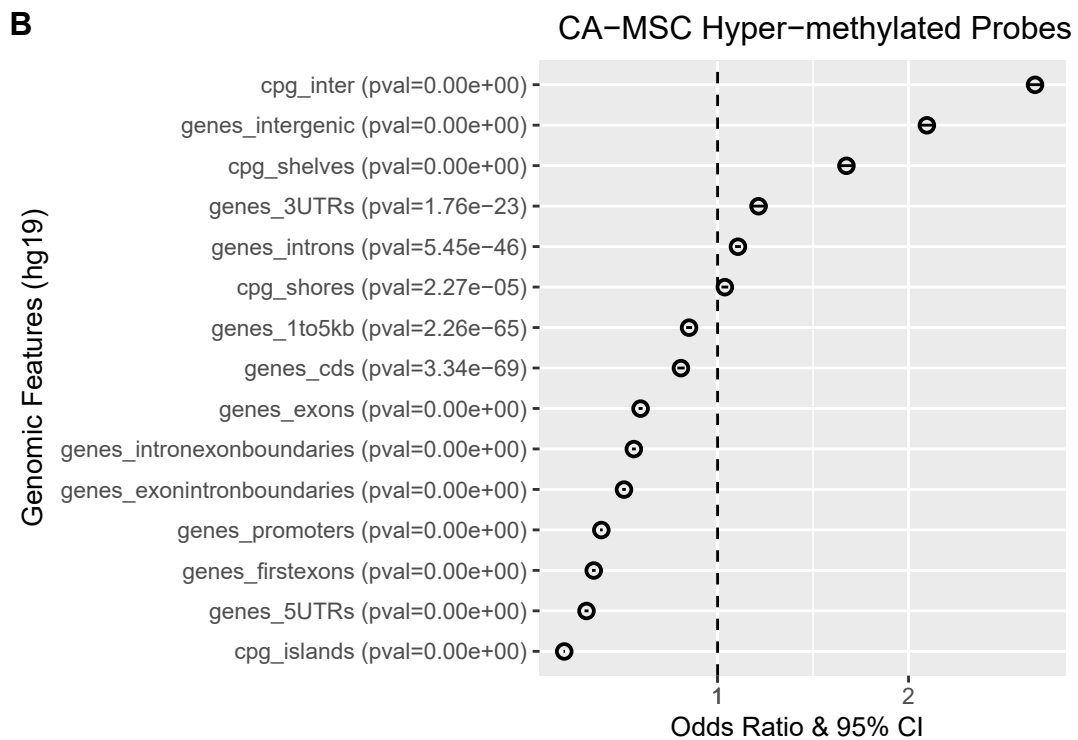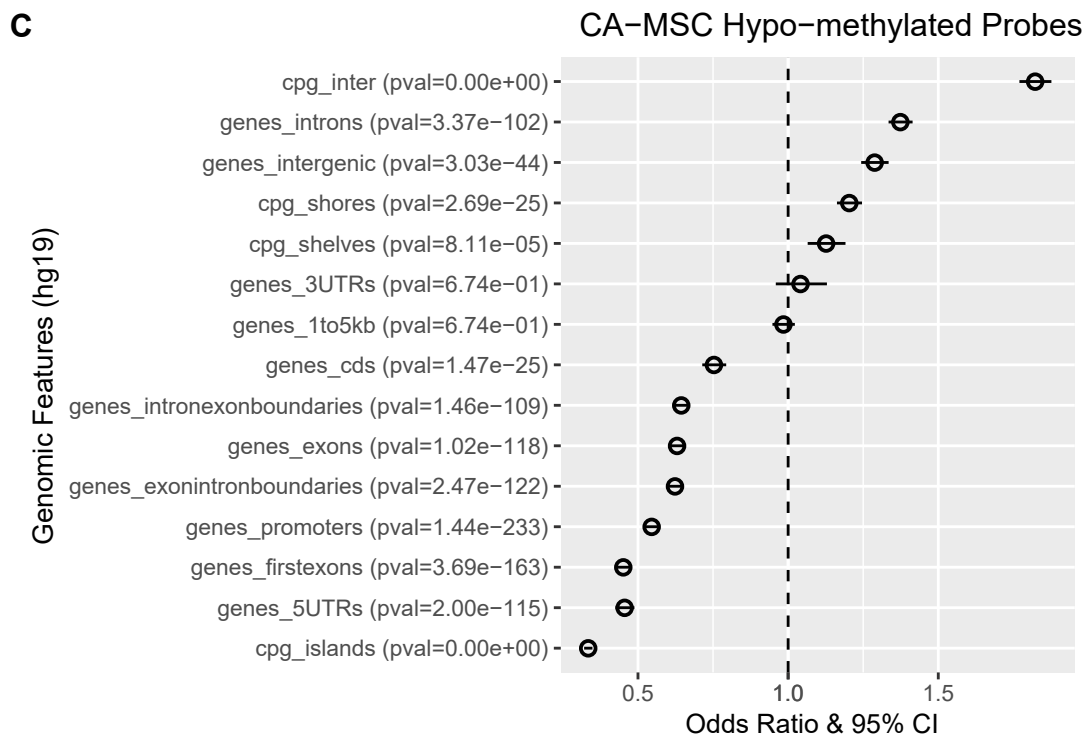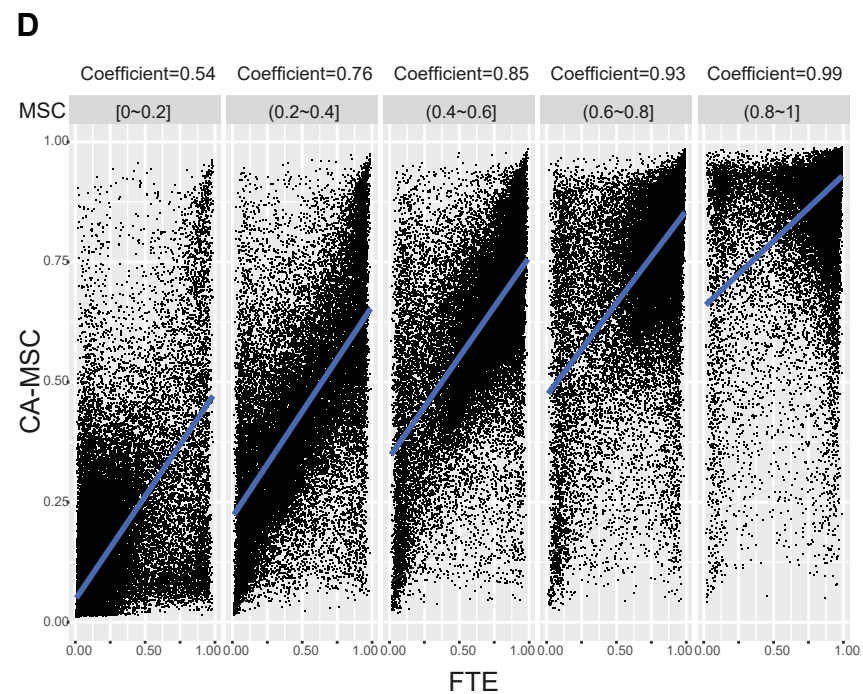

**Figure S1. Additional DNA methylation differences in CA-MSCs vs MSCs, Related to Figure 1.**

- A. DNA methylation heatmap of top differentially methylated loci (FDR<0.05, and absolute group beta value difference > 0.4) between tumor samples and CA-MSCs. Probes are plotted as rows, with samples plotted as columns. Sample group of tumor, normal MSC, and CA-MSC is plotted as column annotation, together with sample isolation source if samples are normal MSCs or CA-MSCs. A blue-to-red gradient indicates a beta value of 0-1 (DNA methylation level of 0% to 100%). Sample CA-MSC\_OM10 with heavy epithelial contamination is highlighted. Isolation site abbreviations: FT, fallopian tube; AD, adipose; OM, omentum; OV, ovary; OMMets, metastasis from omentum.
- B,C. Enrichment of CA-MSC hyper-methylated loci (B) and hypo-methylated loci (C) against different genomic features of CpG and genic annotations. CpG annotations include open sea (cpg\_inter), CpG shores (cpg\_shores), CpG shelves (cpg\_shelves), CpG islands (cpg\_islands). Genic annotations contain 1-5Kb upstream of the TSS (genes\_1to5kb), the promoter (< 1Kb upstream of the TSS; genes\_promoters), 5'UTR (genes\_5UTRs), first exons (genes\_firstexons), exons (genes\_exons), introns (genes\_introns), CDS (genes\_cds), 3'UTR (genes\_3UTRs), and intergenic regions (the intergenic regions exclude the previous list of annotations; genes\_intergenic). Odds ratio and 95% confidence interval (CI) for each feature are shown. Significance level is labeled in parentheses.
- D. Scatter plots showing DNA methylation beta values in CA-MSC (shared y axis) versus fallopian tube epithelium (FTE) samples (x axes), stratified by the methylation level in normal MSCs. Each dot represent one CpG, as measured by one DNA methylation probe. Linear regression lines are plotted in blue, with corresponding regression coefficient (aka. slope) indicated on top of each panel.

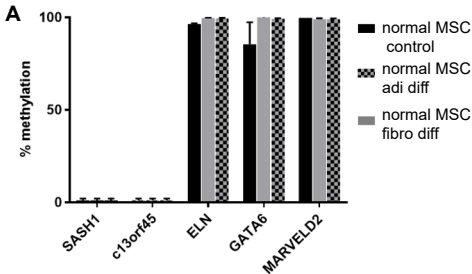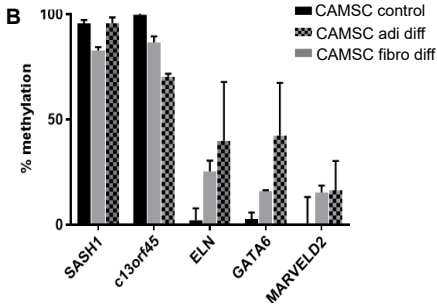



**Figure S2. DNA methylation changes persists with MSC differentiation, Related to Figure 2.**

A,B. DNA methylation levels at the five-locus panel for MSCs (A) and CA-MSCs (B) with adipose ('adi') and fibroblast ('fibro') lineage differentiation. Y axis indicates % methylation as determined by MSP. Ttest between MSCs at each loci  $p > 0.05$ . Mean & SEM of 3 independent samples are represented.

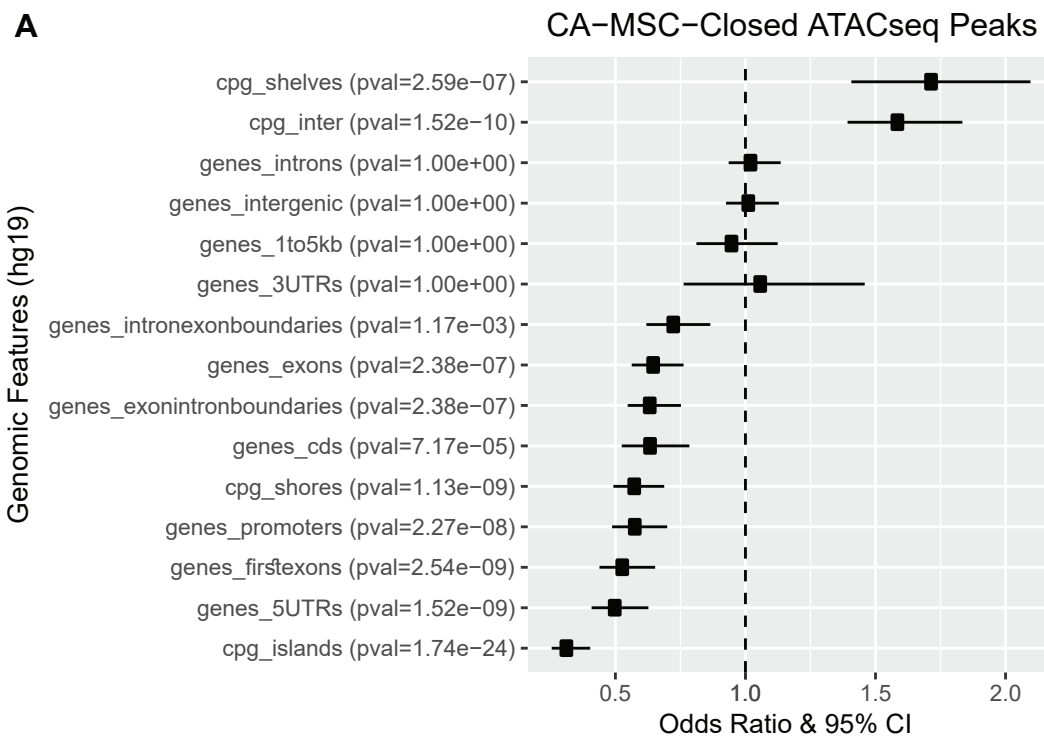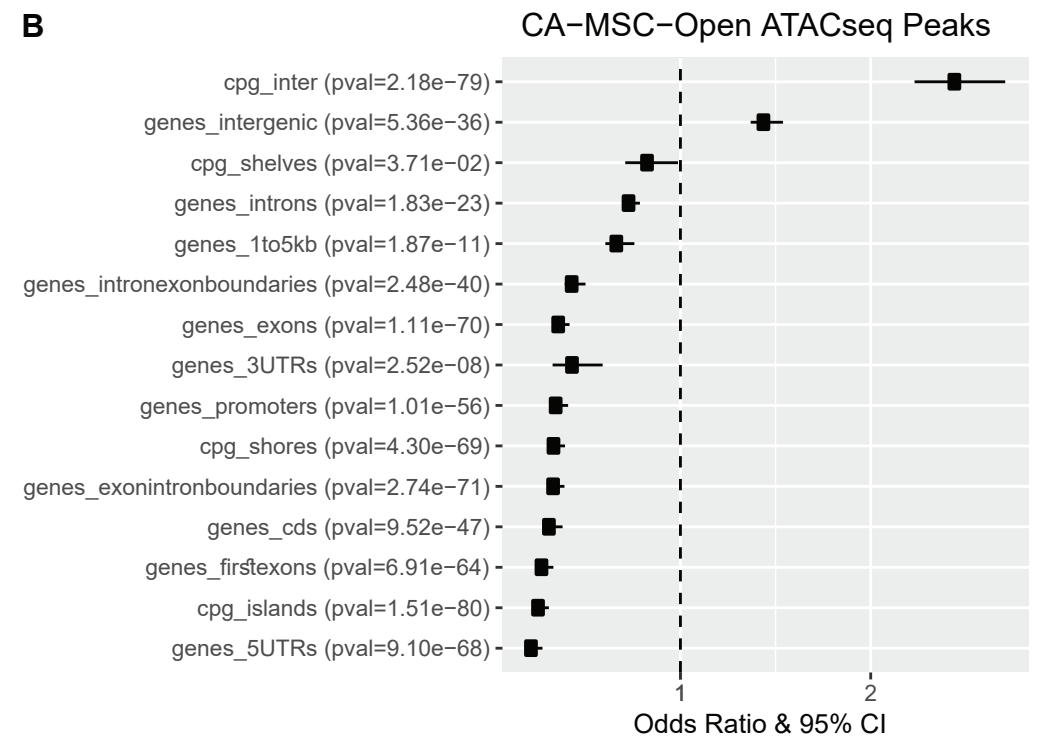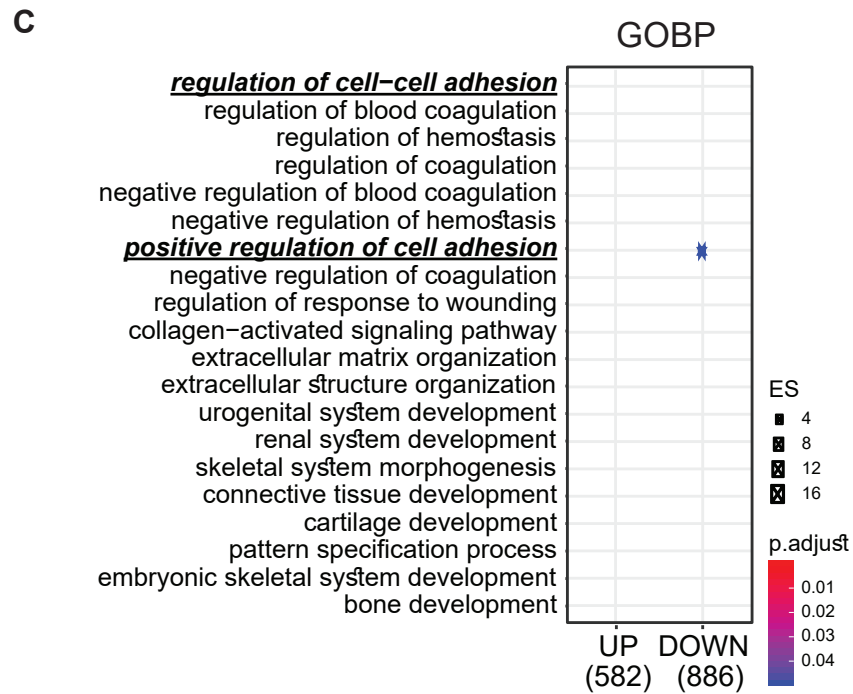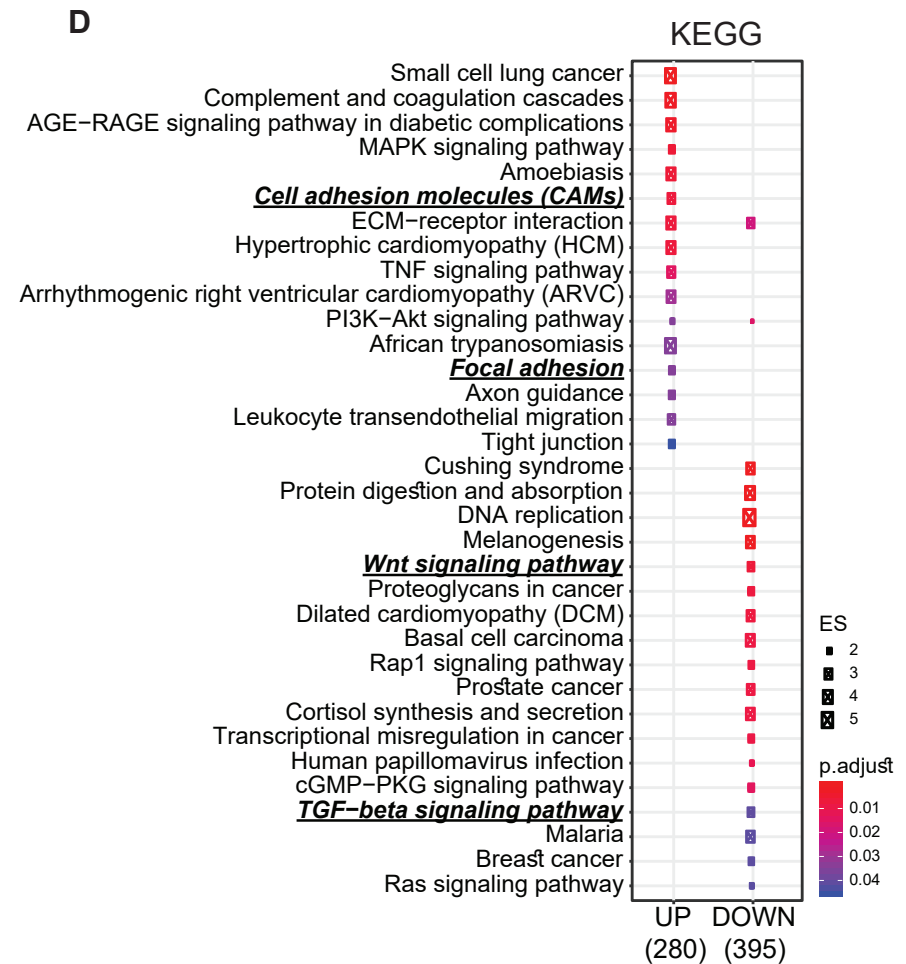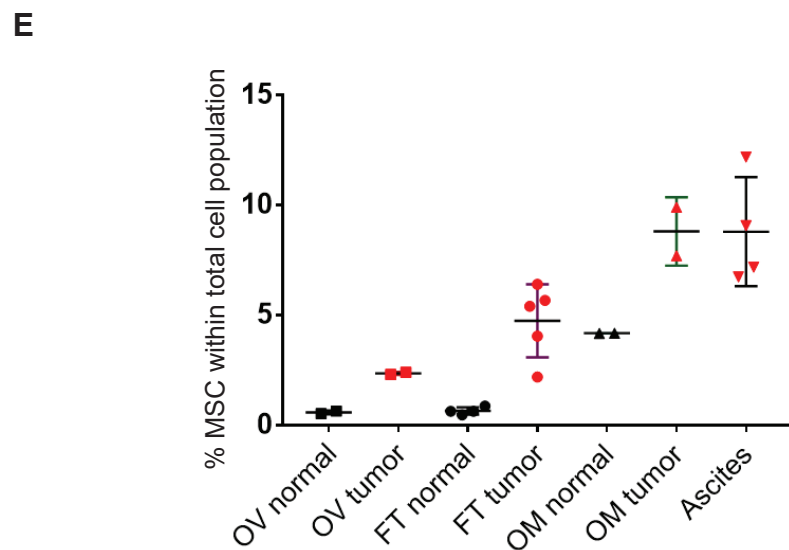

**Figure S3. Additional ATAC-seq, pathway analysis and cellular abundance of CA-MSCs vs MSCs, Related to Figure 3 and 4.**

- A,B. Enrichment of CA-MSC closed (A) and open (B) ATAC-seq peaks against different genomic features of CpG and genic annotations defined as in Supp Figure S1B,C. Odds ratio and 95% confidence interval (CI) for each feature are shown. Significance level is labeled in parentheses.
- C. Gene ontology (GO) enrichment analysis (biological concept of Biological Process; GOBP). The numbers of up- and down-regulated genes comparing CA-MSCs to MSCs are labeled underneath the plot. Each dot represents a GOBP term, with dot size indicating enrichment score (ES), and dot color representing significance level. Two cell adhesion related processes are highlighted for genes upregulated in CA-MSCs.
- D. KEGG (Kyoto Encyclopedia of Genes and Genomes) pathway analysis. Two pathways relevant to cell adhesion are highlighted for upregulated genes, and two pathways relevant to EMT (epithelial-mesenchymal transition), the reverse process of MET, are highlighted for downregulated genes.
- E. MSC quantification from benign and HGSC involved human tissues and ascites. MSCs quantified via flow cytometry (CD90, 73, 105+/CD45, 34, 14, 19- population) and represented as percentage of total viable cell population.

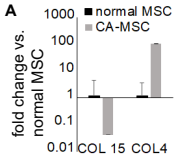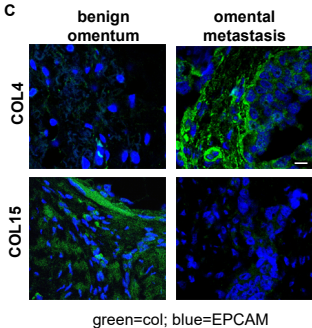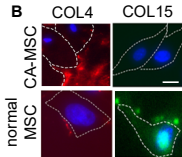

**Figure S4. CA-MSCs have altered collagen secretion associated with increased metastasis, Related to Figure 3.**

- A. qRT-PCR of *COL15* and *COL4* expression in normal MSCs and CA-MSCs. Fold change compared to normal MSC is expressed. Results are the mean and SEM of 3 independent cell lines.
- B. Immunofluorescence of COL4 (red) and COL15 (green) during adherent CA-MSC and normal MSC culture demonstrating increased CA-MSC secretion of COL4 and decreased secretion of COL15. Scale bar=10microns.
- C. Immunofluorescence of COL4 and COL15 in benign omentum and omental HGSC metastasis demonstrating increased COL4 and decreased COL15 in omental metastasis. Scale bar=20microns

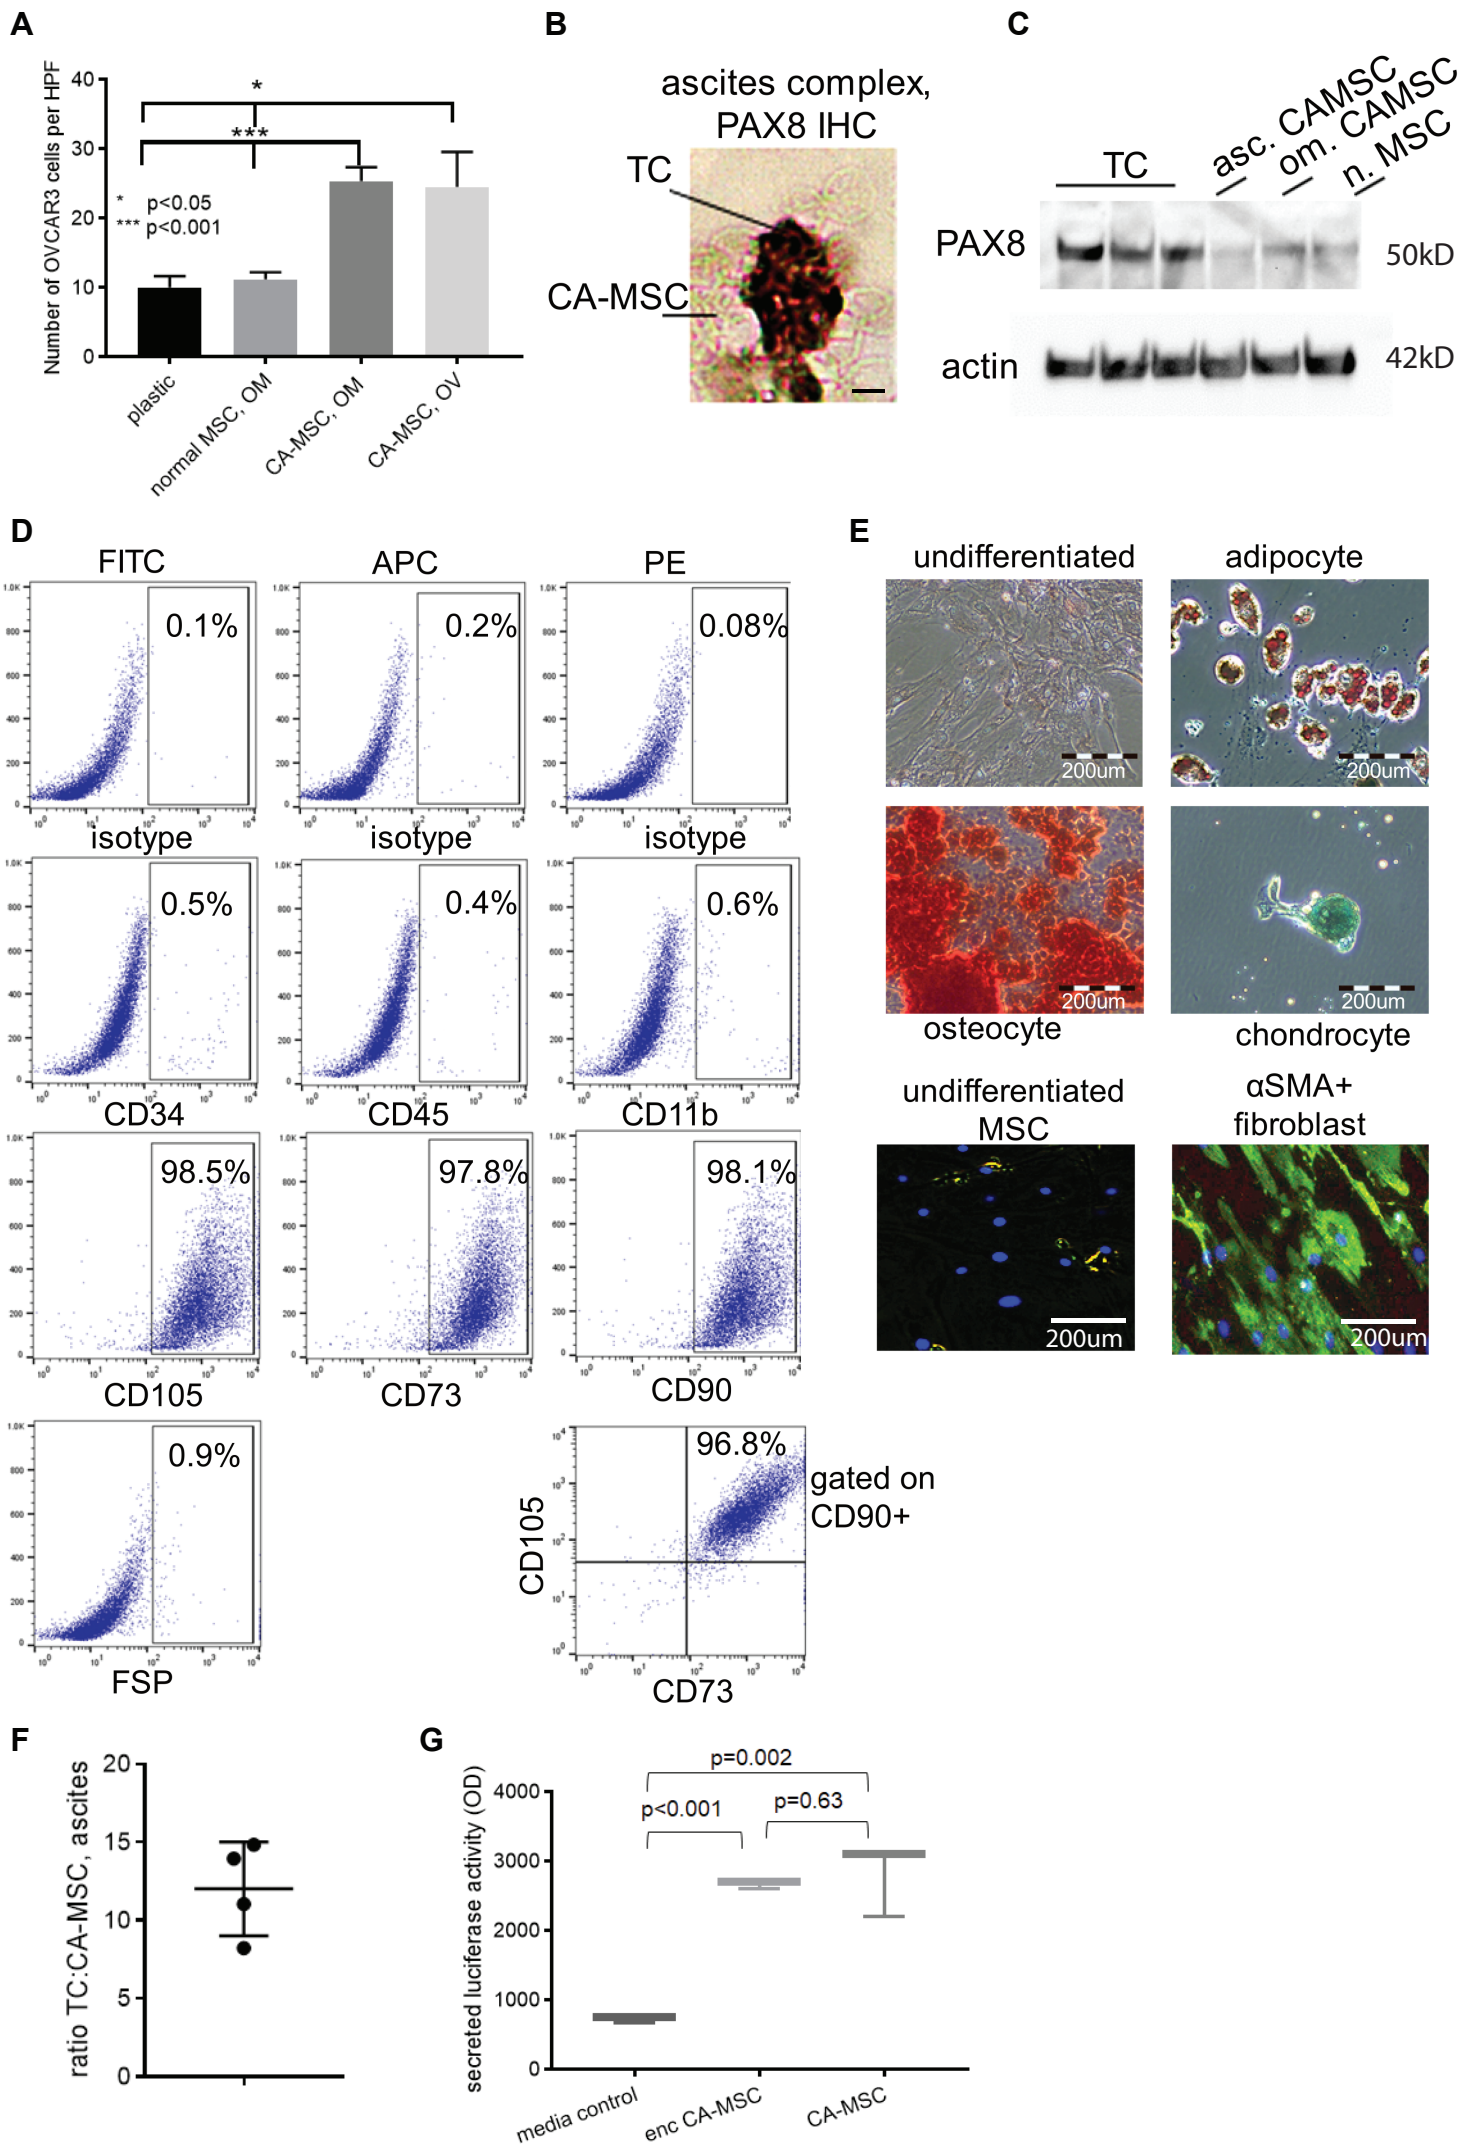

**Figure S5. Additional tumor cell adhesion and CA-MSC verification, Related to Figure 4.**

- A. OVCAR3 binding to plastic, normal omentum (OM) MSCs, CA-MSCs derived from the OM and ovary (OV) demonstrates increased tumor cell adhesion to CA-MSCs. Results quantified by counting fluorescent tumor cells per high power field (HPF). Mean & SEM of 3 independent experiments is represented.
- B. Immunohistochemistry of cytospin of CA-MSC:tumor cell complexes isolated from patient ascites demonstrating strong PAX8 expression in tumor cells and not CA-MSCs. Scale bar=20microns
- C. PAX8 western blot of ovarian tumor cells and CA-MSCs isolated from ascites, omental metastasis and normal MSCs demonstrating CA-MSCs have minimal PAX8 expression which is similar to normal MSC levels and less than tumor cell levels.
- D. CA-MSCs isolated from tissue and ascites complexes were verified to meet MSC differentiation and surface expression criteria. Representative flow cytometry plots characterizing MSCs based on CD105,73,90 positivity and CD34,45,11b negativity and negativity for the fibroblast marker, fibroblast surface protein (FSP). Last plot demonstrates the population triple positive for CD105, 73 and 90. Y axis represent side scatter unless otherwise noted.
- E. Immunohistochemistry of undifferentiated and differentiated MSCs (adipocyte: oil red o; osteocyte: alizarin red; chondrocyte: alcian blue). Immunofluorescence of alpha-smooth muscle actin ( $\alpha$ SMA) in undifferentiated and fibroblast differentiated MSCs demonstrating staining only after fibroblast directed differentiation.
- F. Ratio of tumor cells to CA-MSCs in cellular complexes isolated from ascites. N=4 independent patients.
- G. Secreted luciferase levels (OD measurement) in control media versus media from luciferase-secreting CA-MSCs in standard culture or alginate encapsulated CA-MSCs. Mean and SEM of 3 independent experiments.

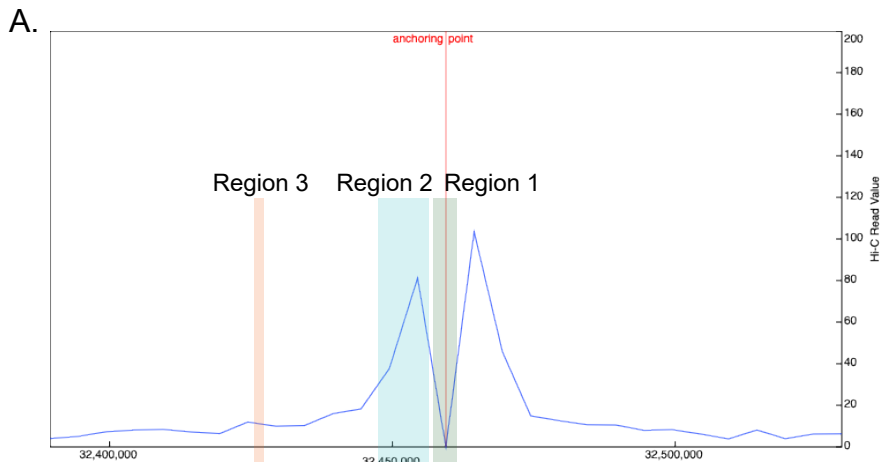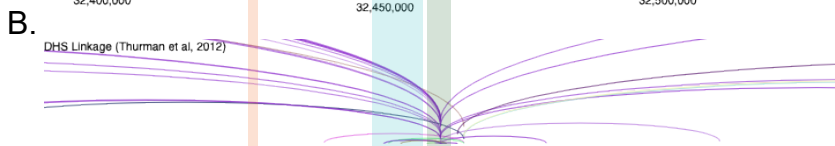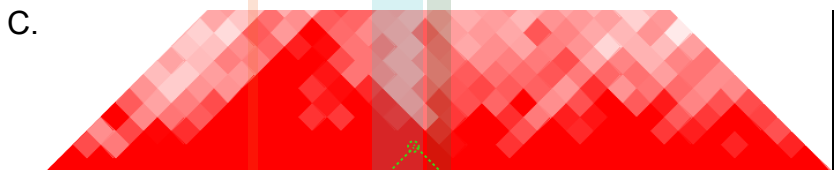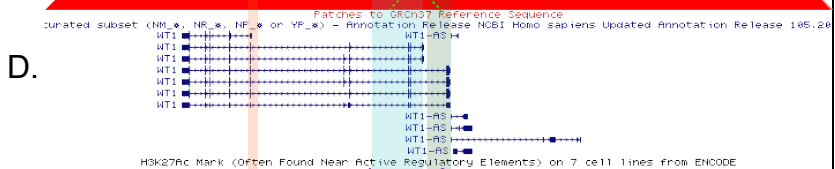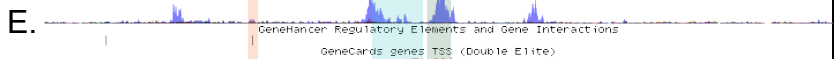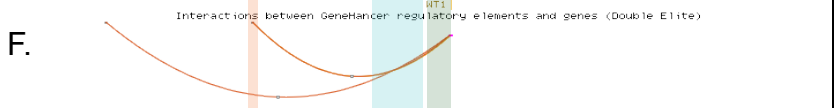



**Figure S6. The 3D Genome Browser view in combination with the UCSC genomic view for gene *WT1* locus, Related to Figure 5.**

A. Circular chromosomal conformation capture (4C) data in cell line K562 is plotted as a curve line (resolution is 5kb), where the center is the bait region (*WT1* TSS, covered by green box, Region 1) and a peak signal indicates there is a chromatin interaction event between the TSS and a potential distal regulatory region supported by HiC reads covering both regions (y-axis).

B-F. (B) DNase I-hypersensitive sites (DHS) linkage track and (C) UCSC tracks of HiC heatmap in K562, (D) gene track, (E) H3K27ac histone marks, and (F) enhancer, promoter, and regulatory interactions curated in GeneHancer database. Intense DHS interactions between the *WT1* promoter region (green box, Region 1) and the first potential enhancer within its gene body (cyan box, Region2) also supports the potential interactions. Dashed green lines and circle show consistency between the UCSC HiC heatmap track (resolution is 5kb) and the peak covered by cyan box (Region 2) from the 4C curve view. Orange box (Region 3) marks a second enhancer within gene *WT1*, which overlaps with known enhancer annotation, and interaction with the *WT1* promoter curated in the GeneHancer database.

**A****ROADMAP MSC H3K27me3 Histone Marks**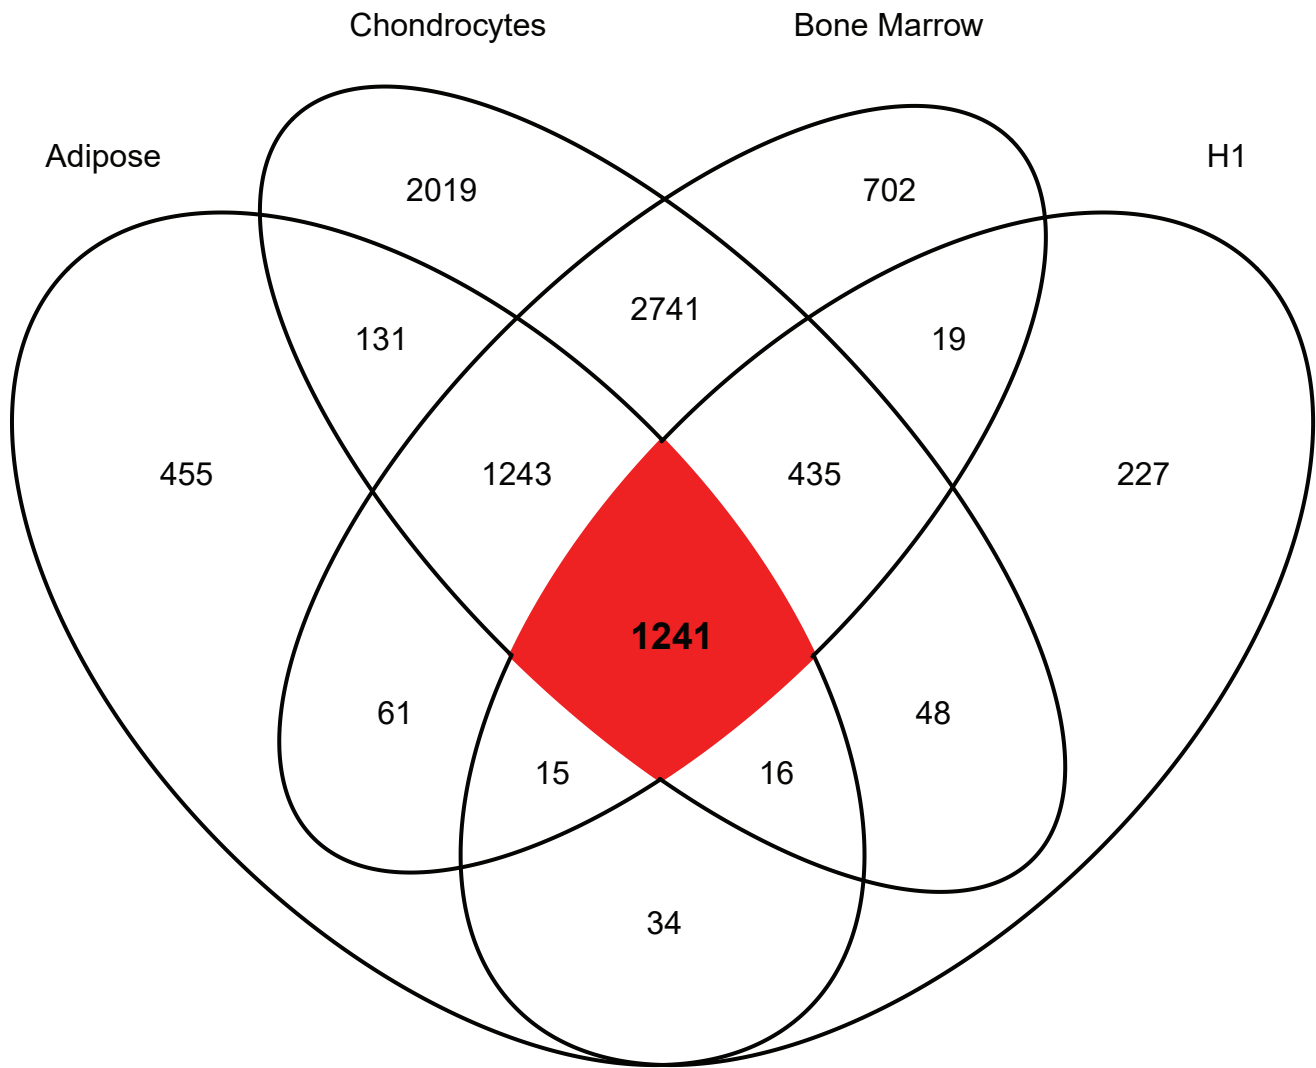**B**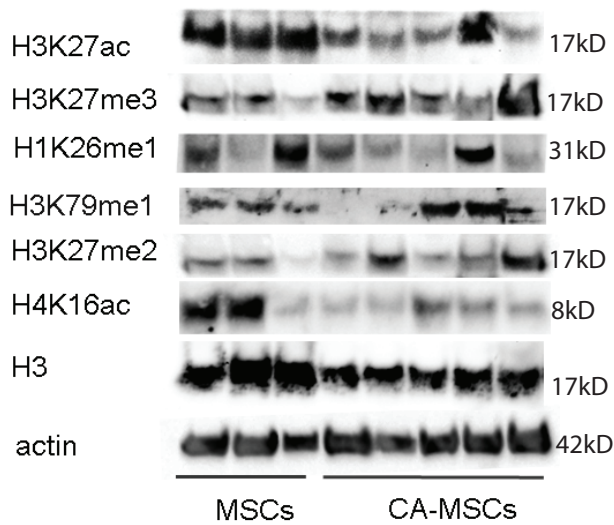**C**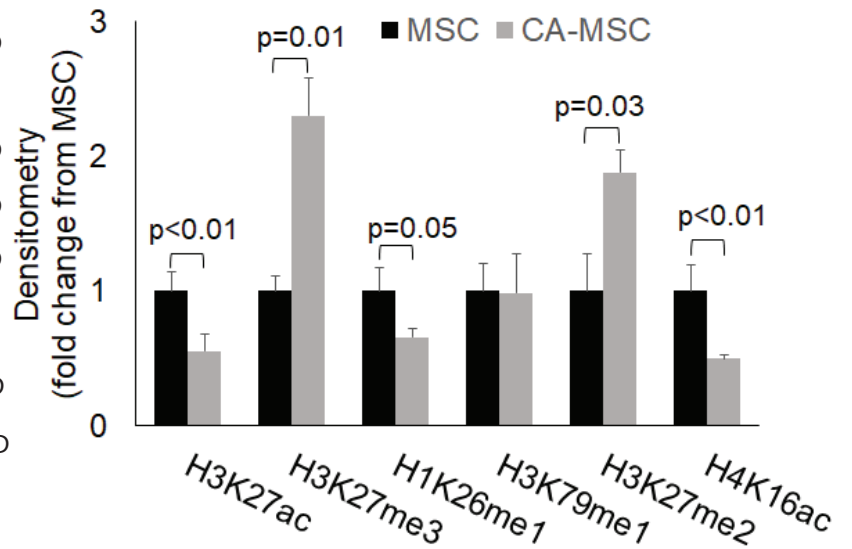

**Figure S7. H3K27me3 peak overlap and verification of histone mass spectrometry, Related to Figure 6.**

- A. Venn diagram showing H3K27me3 peak overlaps among MSCs derived from different sources of adipose, chondrocytes, bone marrow, and H1 cell line. The common set of 1,241 narrow peak regions (as in red) is defined as the EZH2 targets, if they are located within their transcriptional regions plus 2 kb upstream flanking regions of their TSSs.
- B. Western blot verification of differential histone modifications identified by mass spectrometry.
- C. Densitometry quantification of western blot analysis of histone modifications normalized to actin (for H4K16ac and H1K26me1) and H3 (for H3 modifications), in 5 CA-MSCs compared to 3 MSCs. T- test p values between CA-MSC and normal MSC are labeled on top of the bar set for each histone type.

**A**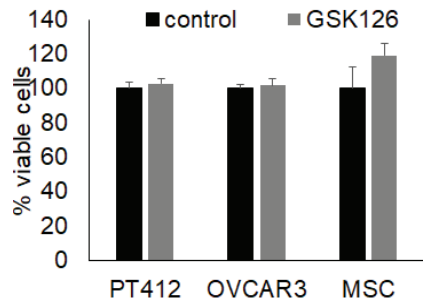**B**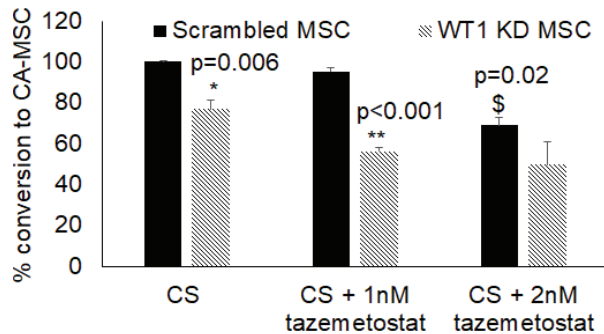**C**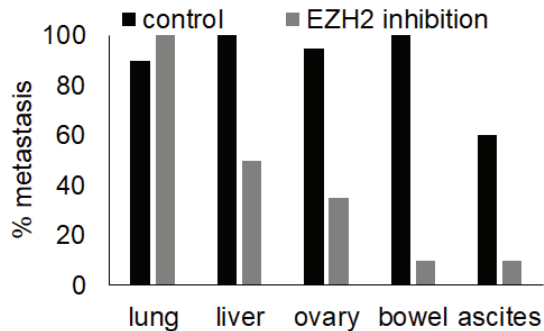**D**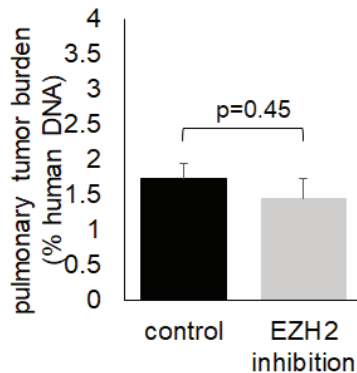

**Figure S8. EZH2 inhibition does not impact tumor cell viability and additional EZH2 inhibitors similarly decrease CA-MSC formation, Related to Figure 4, 6 and STAR methods tissue harvesting.**

- A. Viability of tumor cells PT412 and OVCAR3 and normal MSCs after 5 days treatment with 20nM GSK126 compared to vehicle control.
- B. Quantification of the percent of conversation to CA-MSC in WT1 KD MSCs or scrambled control after cancer stimulation (CS) with hypoxic direct cancer cell co-culture with and without a different EZH2 inhibitor, Tazemetostat. Values are normalized to scrambled control conversion based on CA-MSC classifier score. \*, \*\* = comparison to treatment group scrambled control; \$ = comparison to CS scrambled control without Tazemetostat. Mean & SEM of 3 independent experiments are shown.
- C. EZH2 inhibition limits metastasis formation. Percentage of metastasis formation (y-axis) at different organ sites (x-axis) is shown between EZH2 inhibition and control group in a tail vein injection metastasis model.
- D. Pulmonary tumor burden is shown between EZH2 inhibition and control group.

Table S1

| SampleName   | SampleID          | PatientID | SampleGroup | SampleEPIC          | Source                                                                                                                                                         | SourceCode   |
|--------------|-------------------|-----------|-------------|---------------------|----------------------------------------------------------------------------------------------------------------------------------------------------------------|--------------|
| CAMSC_OM01   | 493_camsc         | s493      | CAMSC       | 201557520003_R03C01 | CA-MSCs derived from the omental metastasis of patients with high grade serous ovarian cancer                                                                  | CAMSC-OMmets |
| CAMSC_OM02   | 549_camsc         | s549      | CAMSC       | 201557520040_R03C01 | CA-MSCs derived from the omental metastasis of patients with high grade serous ovarian cancer                                                                  | CAMSC-OMmets |
| CAMSC_OM03a  | CAMSC1            | s0009     | CAMSC       | 200516380137_R01C01 | CA-MSCs derived from the omental metastasis of patients with high grade serous ovarian cancer                                                                  | CAMSC-OMmets |
| CAMSC_OM03b  | CAMSC2            | s0009     | CAMSC       | 200516380137_R02C01 | CA-MSCs derived from the omental metastasis of patients with high grade serous ovarian cancer                                                                  | CAMSC-OMmets |
| CAMSC_OM05   | CAMSC3            | s0003     | CAMSC       | 200516380137_R03C01 | CA-MSCs derived from the omental metastasis of patients with high grade serous ovarian cancer                                                                  | CAMSC-OMmets |
| CAMSC_OM06a  | CAMSC6            | s0006     | CAMSC       | 200516380137_R06C01 | CA-MSCs derived from the omental metastasis of patients with high grade serous ovarian cancer                                                                  | CAMSC-OMmets |
| CAMSC_OM06b  | CAMSC7            | s0006     | CAMSC       | 200516380137_R07C01 | CA-MSCs derived from the omental metastasis of patients with high grade serous ovarian cancer                                                                  | CAMSC-OMmets |
| CAMSC_OM08   | CAMSC8            | s0008     | CAMSC       | 200516380137_R08C01 | CA-MSCs derived from the omental metastasis of patients with ovarian carcinosarcoma                                                                            | CAMSC-OMmets |
| CAMSC_OM09   | CAMSC9            | s0009     | CAMSC       | 200526210119_R01C01 | CA-MSCs derived from the omental metastasis of patients with high grade serous ovarian cancer                                                                  | CAMSC-OMmets |
| CAMSC_OM10   | 406_camsc         | s406      | CAMSC       | 201557520040_R02C01 | CA-MSCs derived from the omental metastasis of patients with high grade serous ovarian cancer                                                                  | CAMSC-OMmets |
| CAMSC_FT01   | 19-175 FT.camsc   | s19-175   | CAMSC       | 203020780110_R04C01 | CAMSCs derived from fallopian tube involved with high grade serous ovarian cancer                                                                              | CAMSC-FT     |
| CAMSC_OV01   | 19-90 ov.camsc    | s19-90    | CAMSC       | 203020780110_R05C01 | CAMSCs derived from ovary involved with high grade serous ovarian cancer                                                                                       | CAMSC-OV     |
| CAMSC_OV02   | 19-95 ov.camsc    | s19-95    | CAMSC       | 203020780110_R06C01 | CAMSCs derived from ovary involved with high grade serous ovarian cancer                                                                                       | CAMSC-OV     |
| CAMSC_OV03   | 19-263 ov.camsc   | s19-263   | CAMSC       | 203038250154_R06C01 | CAMSCs derived from ovary involved with ovarian cancer                                                                                                         | CAMSC-OV     |
| MSC_OMneo01  | 18-0030 neo n.om  | s18-0030  | MSC         | 203020780110_R08C01 | MSCs derived from omentum that was initially involved with high grade serous ovarian cancer but had a complete pathologic response to neoadjuvant chemotherapy | MSC-OMneo    |
| MSC_OMneo02  | 18-0054 neo n.om  | s18-0054  | MSC         | 203013220061_R01C01 | MSCs derived from omentum that was initially involved with high grade serous ovarian cancer but had a complete pathologic response to neoadjuvant chemotherapy | MSC-OMneo    |
| MSC_OMneo03  | 18-0048 neo n.om  | s18-0048  | MSC         | 203013220061_R02C01 | MSCs derived from omentum that was initially involved with high grade serous ovarian cancer but had a complete pathologic response to neoadjuvant chemotherapy | MSC-OMneo    |
| MSC_OMneo04  | 19-107 n.om (neo) | s19-107   | MSC         | 203013220061_R03C01 | MSCs derived from omentum that was never involved with cancer (stage II ovarian cancer) but patient had neoadjuvant chemotherapy                               | MSC-OMneo    |
| MSC_FT01     | 19-120 n.FT       | s19-120   | MSC         | 203013220061_R04C01 | MSCs derived from normal fallopian tube                                                                                                                        | MSC-FT       |
| MSC_FT02     | 19-197 n.FT       | s19-197   | MSC         | 203013220061_R05C01 | MSCs derived from normal fallopian tube                                                                                                                        | MSC-FT       |
| MSC_FT03     | 19-128 n.FT       | s19-128   | MSC         | 203013220061_R06C01 | MSCs derived from normal fallopian tube but with hydrosalpinx                                                                                                  | MSC-FT       |
| MSC_FT04     | AL n.FT           | s0007     | MSC         | 203013220061_R07C01 | MSCs derived from normal fallopian tube                                                                                                                        | MSC-FT       |
| MSC-FT-Brcal | 19-257 LFT BRCA2  | s19-257   | MSC         | 203038250154_R02C01 | MSCs derived from left fallopian tube with BRCA2 mutation                                                                                                      | MSC-FT       |
| MSC-FT-Brcar | 19-257 RFT BRCA2  | s19-257   | MSC         | 203038250154_R03C01 | MSCs derived from right fallopian tube with BRCA2 mutation                                                                                                     | MSC-FT       |
| MSC_FT07     | 19-223 #2 nFT     | s19-223   | MSC         | 203038250154_R04C01 | MSCs derived from normal fallopian tube                                                                                                                        | MSC-FT       |
| MSC_ADD01    | amsc_1125         | s1125     | MSC         | 201557520040_R04C01 | MSCs derived from adipose purchased through ATCC                                                                                                               | MSC-AD       |
| MSC_ADD02    | amsc_2118         | s2118     | MSC         | 201557520003_R05C01 | MSCs derived from adipose purchased through ATCC                                                                                                               | MSC-AD       |
| MSC_OM01a    | MSC1              | s0001     | MSC         | 200526210119_R02C01 | MSCs derived from normal omental tissue undergoing surgery for benign indications                                                                              | MSC-OM       |
| MSC_OM01b    | MSC2              | s0001     | MSC         | 200526210119_R03C01 | MSCs derived from normal omental tissue undergoing surgery for benign indications                                                                              | MSC-OM       |
| MSC_OM01c    | MSC5              | s0001     | MSC         | 200526210119_R06C01 | MSCs derived from normal omental tissue undergoing surgery for benign indications                                                                              | MSC-OM       |
| MSC_OM01d    | MSC6              | s0001     | MSC         | 200526210119_R07C01 | MSCs derived from normal omental tissue undergoing surgery for benign indications                                                                              | MSC-OM       |
| MSC_OM05     | 18-691 n.om CC    | s18-691   | MSC         | 203013220061_R08C01 | MSCs derived from normal omentum from patient with a stage II clear cell endometrial cancer                                                                    | MSC-OM       |
| MSC_OM05b    | 18-691 n.om CC    | s18-691   | MSC         | 203038250154_R01C01 | MSCs derived from normal omentum from patient with a stage II clear cell endometrial cancer                                                                    | MSC-OM       |
| MSC_OM07     | 19-319 n.om       | s19-319   | MSC         | 203038250154_R05C01 | MSCs derived from normal omentum                                                                                                                               | MSC-OM       |

Table S1. Sample list summary, Related to Figure 1 and STAR methods DNA methylation array
